# Supplementary material for: Towards the development of a safer by design mineral photocatalytic paint: influence of the TiO 2 modifications on particle release
Source: Royal Society of Chemistry journal article supplement (doi:10.1039/d4en00681j), 2024-12-18
Supplement: d4en00681j1.pdf [file d4en00681j1.pdf]

## Towards the development of safer by design mineral photocatalytic paint: influence of the TiO<sub>2</sub> modifications on particle release

A. Rosset<sup>a</sup>, I. Michaud-Soret<sup>b</sup>, I. Capron<sup>c</sup>, H. Voisin<sup>c</sup>, G. Brochard<sup>d</sup>, V. Bergé<sup>d</sup>, A. Benayad<sup>a</sup>, A. Guiot<sup>a</sup>, S. Clavaguera<sup>a</sup>, S. Artous<sup>a\*</sup>

<sup>a</sup> Univ. Grenoble Alpes, CEA, LITEN, DTNM, LMSE, F-38000 Grenoble, France.

Email: [sebastien.artous@cea.fr](mailto:sebastien.artous@cea.fr)

<sup>b</sup> Univ. Grenoble Alpes, CEA, CNRS, BIG, CBM, F-38000 Grenoble, France.

<sup>c</sup> INRAE, UR BIA, F-44316, Nantes, France.

<sup>d</sup> ALLIOS, Les Docks II, 185 Chemin de Saint-Lambert, F-13821 La Penne-sur-Huveaune, France.

### Supplementary Material

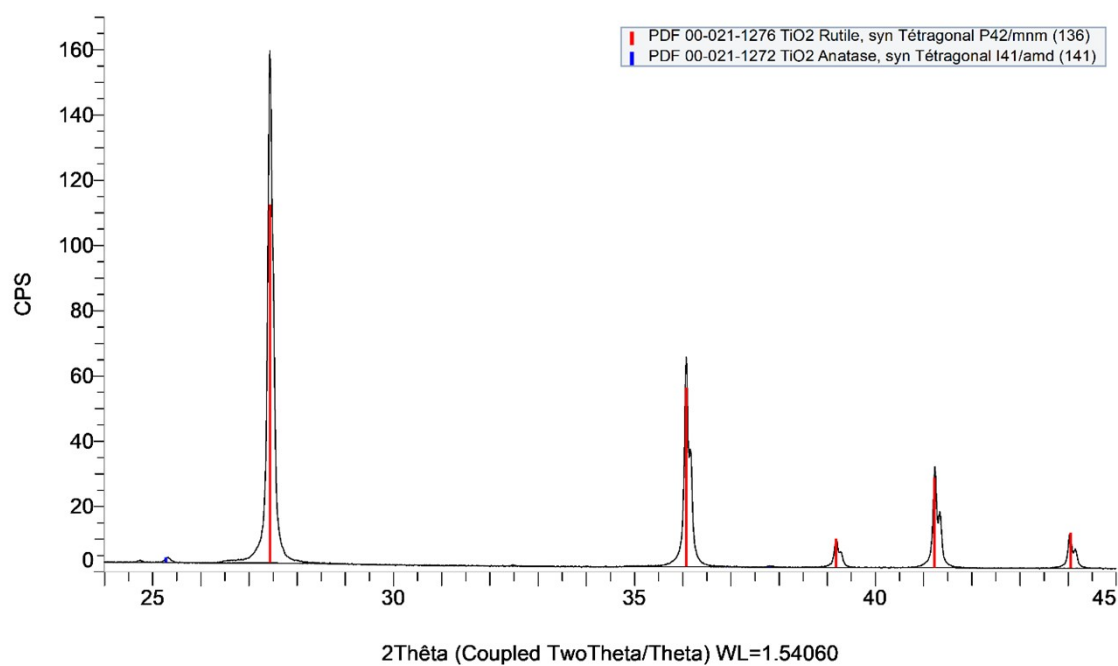

Fig. S1: XRD spectra of TiO<sub>2</sub> microparticles used in paint as a white pigment.

Table S1: Color coordinates for paints before and after 500 hours and 1000 hours exposure to artificial weathering.

| Samples                    | Color coordinates |              |              |              |
|----------------------------|-------------------|--------------|--------------|--------------|
|                            | L*                | a*           | b*           | $\Delta E^*$ |
| T 0h                       | 87.57 ± 0.34      | 0.33 ± 0.08  | 1.69 ± 0.09  | -            |
| T 500h                     | 89.63 ± 0.07      | 0.53 ± 0.01  | 0.65 ± 0.02  | 2.31         |
| T 1000h                    | 89.57 ± 0.04      | 0.57 ± 0.01  | 0.64 ± 0.05  | 2.27         |
| Tn <sub>TiO2</sub> 0h      | 90.38 ± 0.33      | -0.61 ± 0.03 | 1.35 ± 0.13  | -            |
| Tn <sub>TiO2</sub> 500h    | 91.45 ± 0.17      | 0.45 ± 0.01  | 0.02 ± 0.00  | 2.01         |
| Tn <sub>TiO2</sub> 1000h   | 89.56 ± 0.37      | 0.30 ± 0.08  | -0.25 ± 0.07 | 2.01         |
| W 0h                       | 94.58 ± 0.07      | -0.34 ± 0.01 | 3.10 ± 0.05  | -            |
| W 500h                     | 94.89 ± 0.16      | -0.20 ± 0.05 | 2.99 ± 0.08  | 0.36         |
| W 1000h                    | 94.40 ± 0.39      | -0.38 ± 0.23 | 2.85 ± 0.25  | 0.31         |
| Wn <sub>TiO2</sub> 0h      | 95.27 ± 0.12      | -0.28 ± 0.01 | 2.96 ± 0.07  | -            |
| Wn <sub>TiO2</sub> 500h    | 95.09 ± 0.64      | -0.47 ± 0.27 | 2.55 ± 0.16  | 0.49         |
| Wn <sub>TiO2</sub> 1000h   | 94.49 ± 0.15      | -0.27 ± 0.15 | 3.15 ± 0.03  | 0.80         |
| W <sub>PEG1/1</sub> 0h     | 94.84 ± 0.31      | -0.50 ± 0.23 | 3.08 ± 0.21  | -            |
| W <sub>PEG1/1</sub> 500h   | 95.29 ± 0.05      | -0.24 ± 0.01 | 3.26 ± 0.04  | 0.55         |
| W <sub>PEG1/1</sub> 1000h  | 94.85 ± 0.46      | -0.23 ± 0.10 | 3.61 ± 0.22  | 0.59         |
| W <sub>PEG5/1</sub> 0h     | 94.90 ± 0.12      | -0.35 ± 0.02 | 3.22 ± 0.09  | -            |
| W <sub>PEG5/1</sub> 500h   | 95.11 ± 0.19      | -0.20 ± 0.02 | 3.83 ± 0.16  | 0.66         |
| W <sub>PEG5/1</sub> 1000h  | 94.21 ± 0.11      | -0.25 ± 0.03 | 3.99 ± 0.13  | 1.04         |
| W <sub>CNC13.7</sub> 0h    | 94.19 ± 0.49      | -0.46 ± 0.25 | 2.87 ± 0.20  | -            |
| W <sub>CNC13.7</sub> 500h  | 94.74 ± 0.02      | -0.24 ± 0.01 | 3.07 ± 0.06  | 0.63         |
| W <sub>CNC13.7</sub> 1000h | 94.83 ± 0.65      | -0.18 ± 0.01 | 2.83 ± 0.03  | 0.70         |
| W <sub>CNC21.9</sub> 0h    | 94.40 ± 0.36      | -0.44 ± 0.20 | 2.96 ± 0.19  | -            |
| W <sub>CNC21.9</sub> 500h  | 94.69 ± 0.29      | -0.18 ± 0.01 | 3.15 ± 0.17  | 0.43         |
| W <sub>CNC21.9</sub> 1000h | 94.42 ± 0.08      | -0.18 ± 0.01 | 3.13 ± 0.03  | 0.31         |

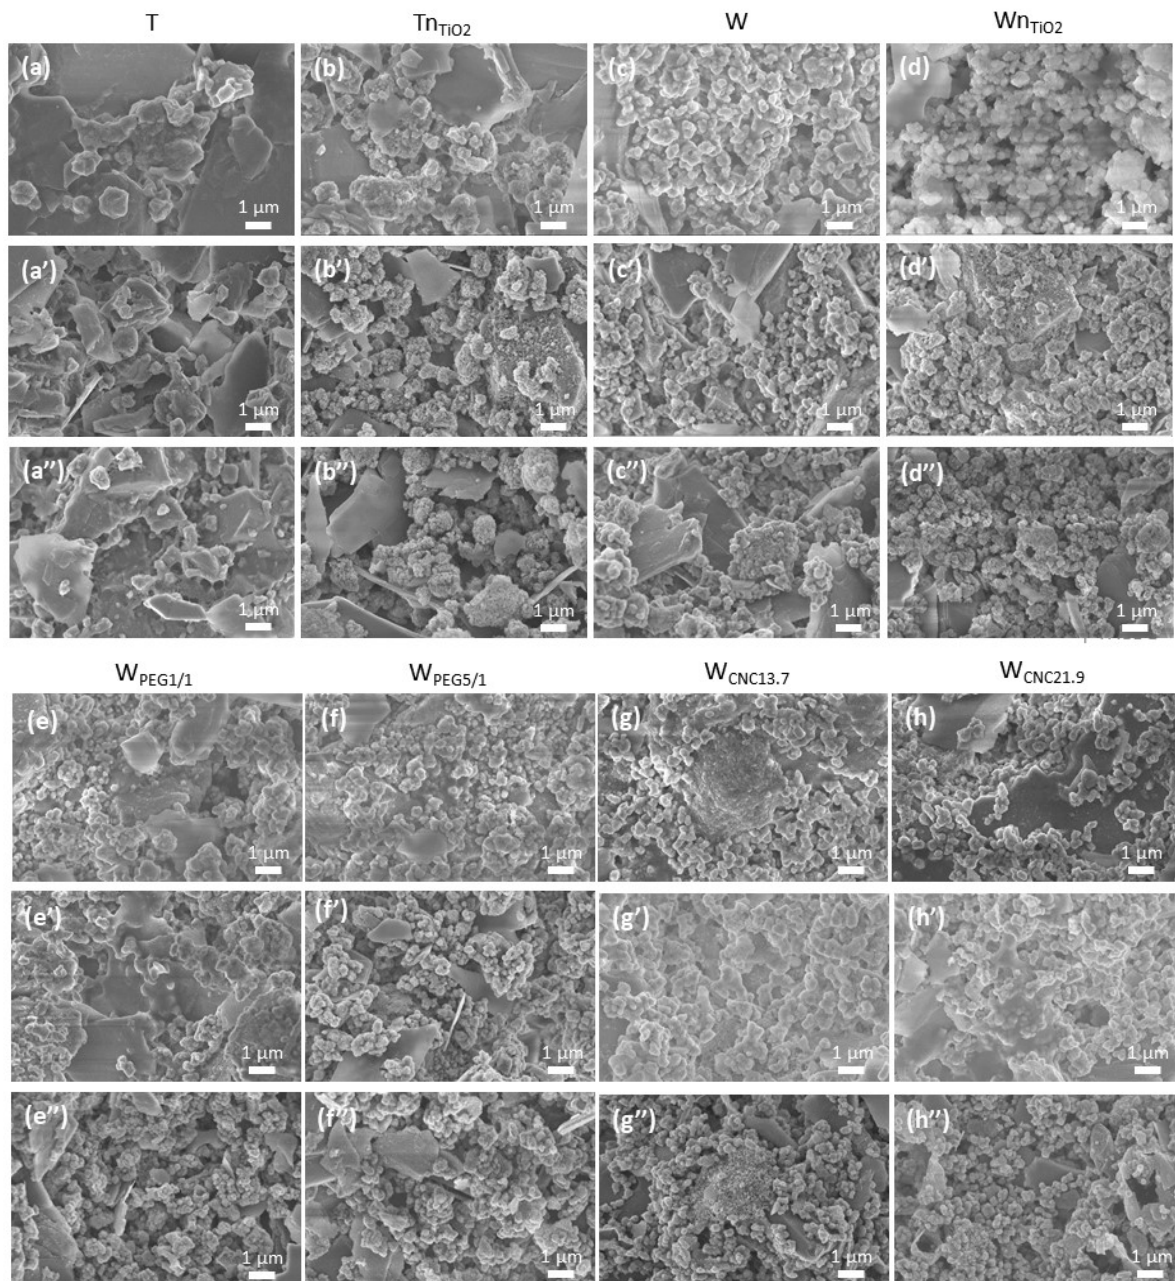

Fig. S2: SEM images of T (a), Tn<sub>TiO2</sub> (b), W (c), Wn<sub>TiO2</sub> (d), W<sub>PEG1/1</sub> (e), W<sub>PEG5/1</sub> (f), W<sub>CNC13.7</sub>(g) and W<sub>CNC13.9</sub> (h) paints before artificial weathering. The paints after 500 hours and 1000 hours exposure to artificial weathering are noted respectively with (') and (''), magnification 50 K

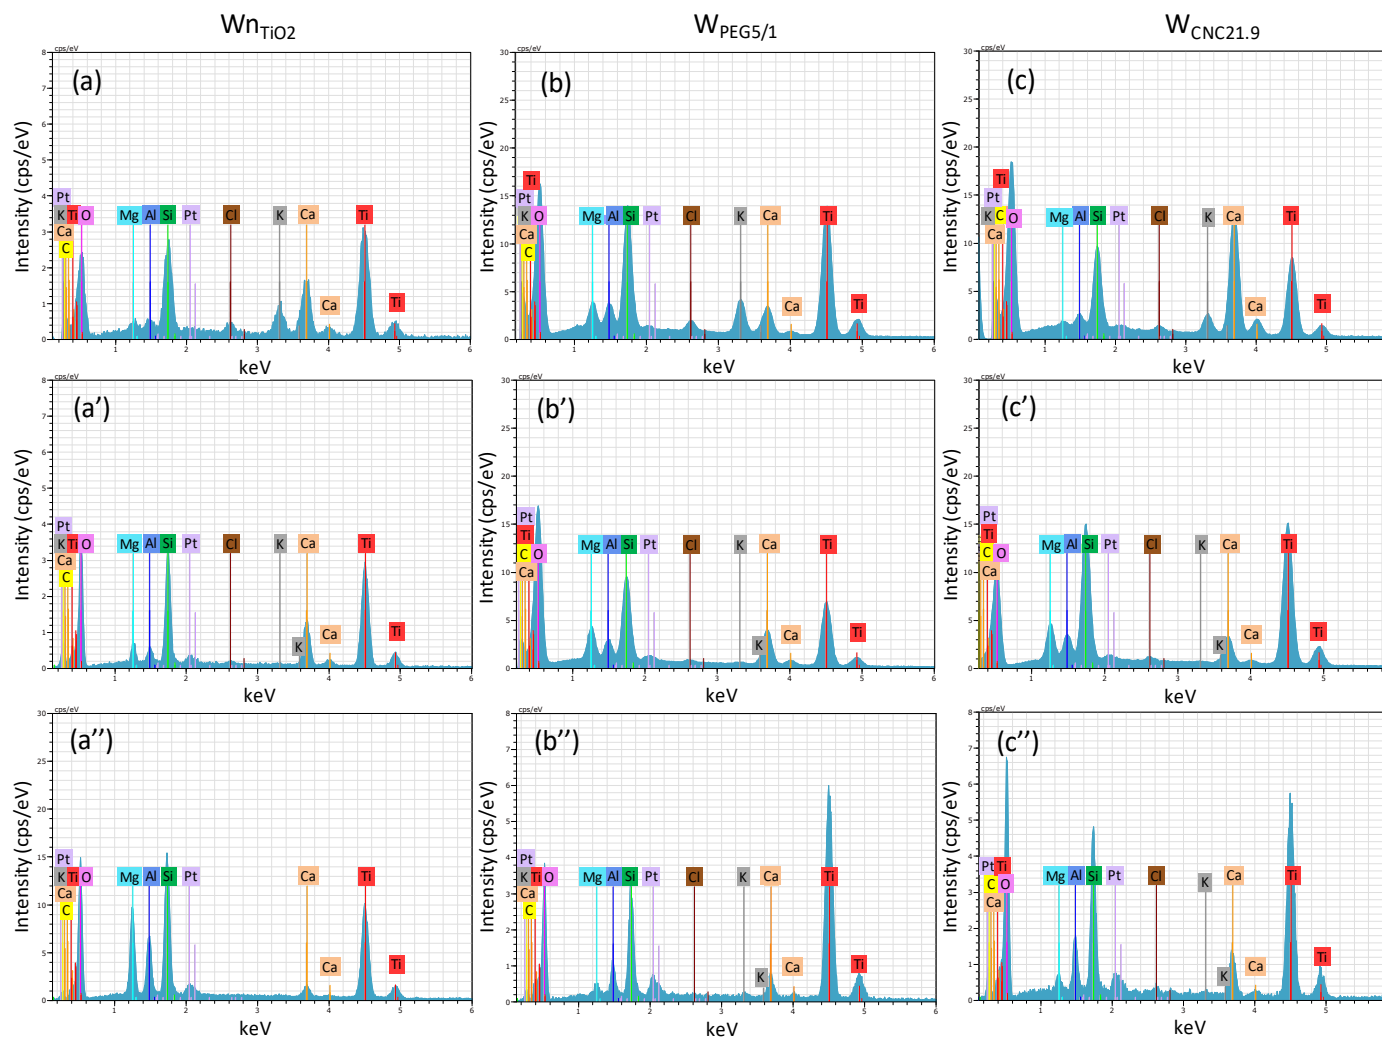

Fig. S3: EDX spectra of  $Wn_{TiO_2}$  (a),  $W_{PEG5/1}$  (b) and  $W_{CNC21.9}$  (c) paints before artificial weathering. The paints after 500 hours and 1000 hours exposure to artificial weathering are noted respectively with (') and ('').

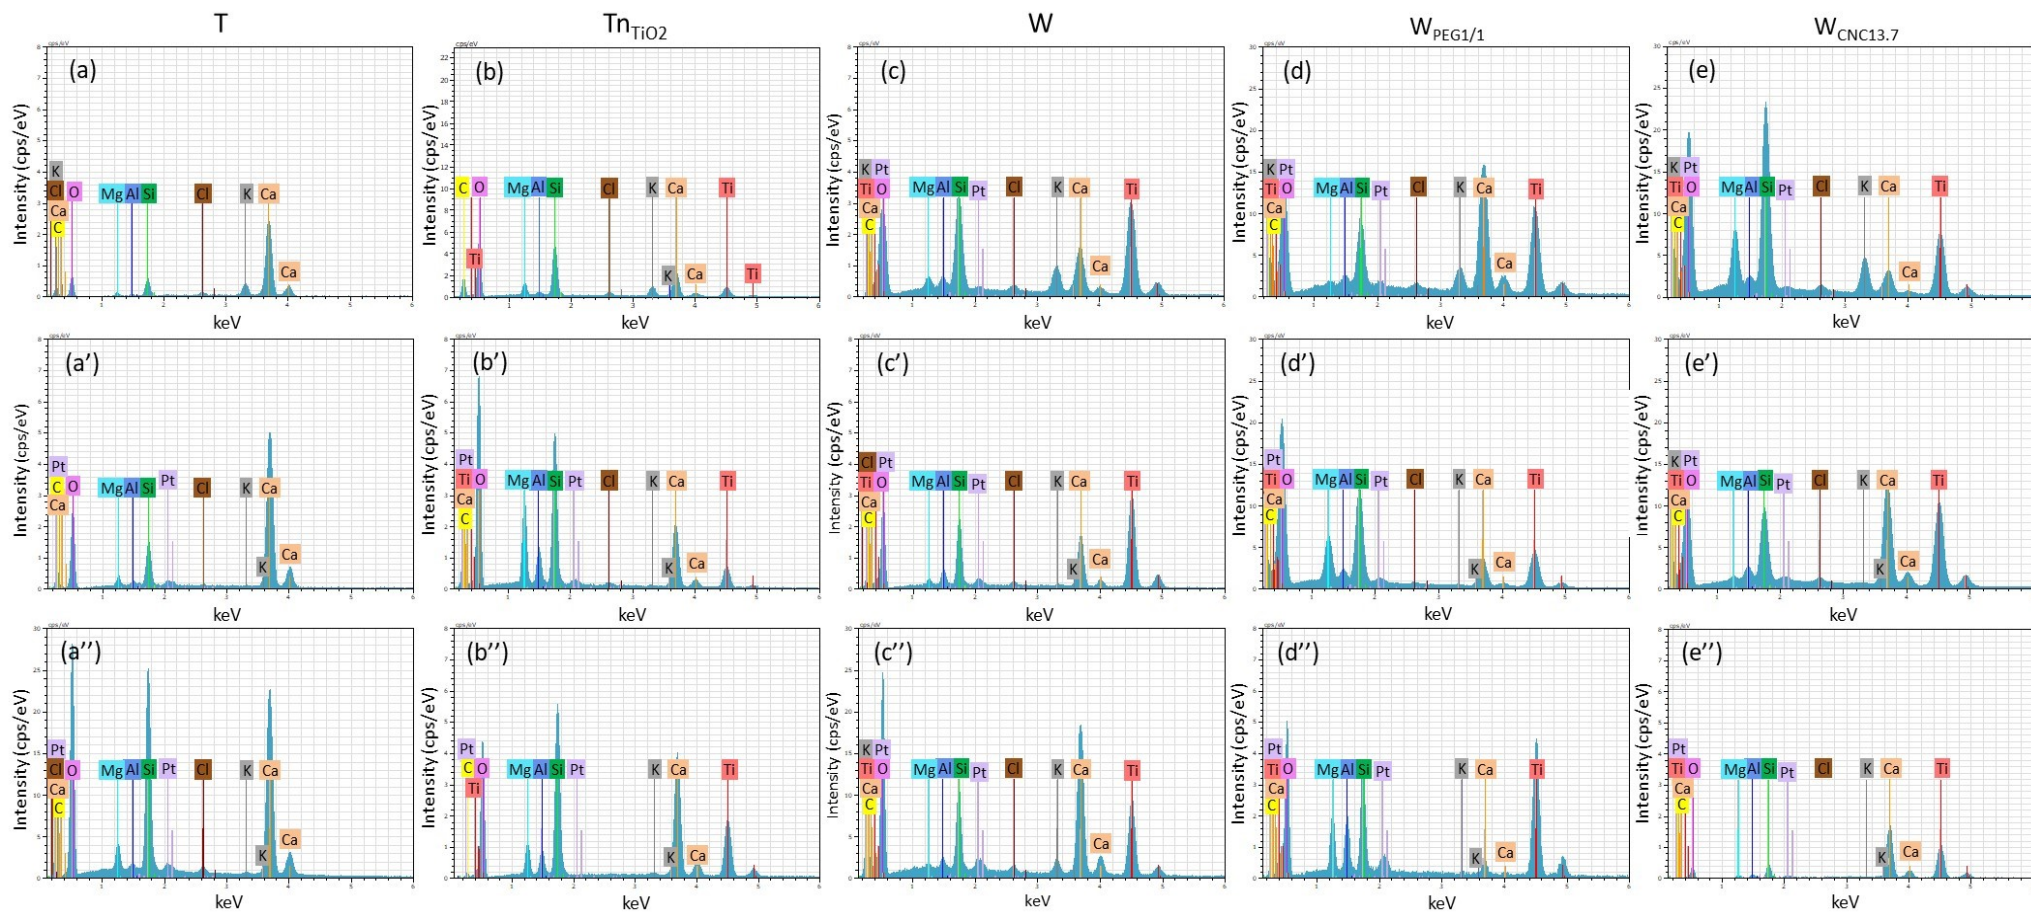

Fig. S4: EDX spectra of T (a),  $Tn_{TiO_2}$  (b), W (c),  $W_{PEG1/1}$  (d) and  $W_{CNC13.7}$  (e) paints before artificial weathering. The paints after 500 hours and 1000 hours exposure to artificial weathering are noted respectively with (') and ('').

Table S2: Chemical composition of paints analyzed by XPS before and after artificial weathering.

| Paints                        | Artificial weathering (hours) | C 1s (%.at) | O 1s (%.at) | Mg 2s (%.at) | Al 2p (%.at) | Si 2p (%.at) | K 2p (%.at) | Ca 2p (%.at) | Ti 2p (%.at) |
|-------------------------------|-------------------------------|-------------|-------------|--------------|--------------|--------------|-------------|--------------|--------------|
| T                             | 0                             | 64.9        | 19.9        | 1.0          | 0.1          | 11.3         | 1.7         | 0.0          | 0.0          |
|                               | 500                           | 45.8        | 31.4        | 4.5          | 2.1          | 12.0         | 0.3         | 3.9          | 0.0          |
|                               | 1000                          | 48.1        | 30.8        | 2.2          | 3.5          | 12.9         | 0.5         | 4.1          | 0.0          |
| Tn <sub>TiO<sub>2</sub></sub> | 0                             | 67.4        | 19.4        | 0.9          | 0.3          | 10.3         | 1.3         | 0.0          | 0.1          |
|                               | 500                           | 22.2        | 42.4        | 6.6          | 4.6          | 16.0         | 0.7         | 5.3          | 2.2          |
|                               | 1000                          | 22.3        | 47.1        | 3.2          | 6.7          | 16.3         | 0.7         | 4.7          | 2.2          |
| W                             | 0                             | 70.3        | 17.6        | 0.1          | 0.2          | 10.1         | 1.2         | 0.0          | 0.0          |
|                               | 500                           | 57.5        | 26.2        | 2.1          | 0.9          | 11.8         | 0.3         | 1.4          | 0.0          |
|                               | 1000                          | 62.3        | 23.5        | 3.3          | 0.7          | 10.9         | 0.4         | 2.1          | 0.1          |
| Wn <sub>TiO<sub>2</sub></sub> | 0                             | 63.3        | 22.3        | 0.8          | 0.2          | 9.9          | 2.5         | 0.0          | 0.4          |
|                               | 500                           | 52.6        | 28.9        | 2.3          | 1.3          | 11.6         | 0.5         | 1.7          | 1.2          |
|                               | 1000                          | 21.1        | 47.1        | 8.6          | 4.9          | 12.0         | 0.0         | 8.3          | 6.7          |
| W <sub>PEG1/1</sub>           | 0                             | 68.6        | 18.9        | 0.4          | 0.2          | 9.8          | 1.3         | 0.3          | 0.0          |
|                               | 500                           | 15.9        | 49.7        | 3.2          | 6.9          | 16.5         | -           | 6.1          | 1.7          |
|                               | 1000                          | 23.1        | 41.3        | 3.8          | 8.2          | 15.4         | 0.9         | 4.7          | 1.5          |
| W <sub>PEG5/1</sub>           | 0                             | 64.9        | 21.4        | 0.7          | 0.3          | 10.6         | 1.7         | 0.5          | 0.0          |
|                               | 500                           | 53.9        | 27.4        | 2.9          | 1.5          | 12.2         | -           | 6.1          | 1.7          |
|                               | 1000                          | 29.4        | 39.6        | 3.3          | 5.1          | 16.5         | 0.5         | 3.9          | 0.5          |
| W <sub>CNC13.7</sub>          | 0                             | 67.0        | 19.8        | 0.7          | 0.0          | 9.1          | 2.1         | 0.5          | 0.0          |
|                               | 500                           | 36.0        | 38.3        | 3.0          | 3.2          | 15.3         | -           | 3.7          | 0.4          |
|                               | 1000                          | 57.6        | 26.5        | 1.8          | 1.2          | 11.2         | 0.3         | 1.2          | 0.1          |
| W <sub>CNC21.9</sub>          | 0                             | 65.3        | 20.9        | 0.4          | 0.2          | 10.2         | 2.1         | 0.4          | 0.0          |
|                               | 500                           | 38.0        | 36.2        | 2.8          | 4.2          | 14.9         | -           | 3.6          | 0.3          |
|                               | 1000                          | 36.6        | 35.2        | 3.8          | 5.0          | 13.9         | 0.2         | 4.4          | 0.6          |

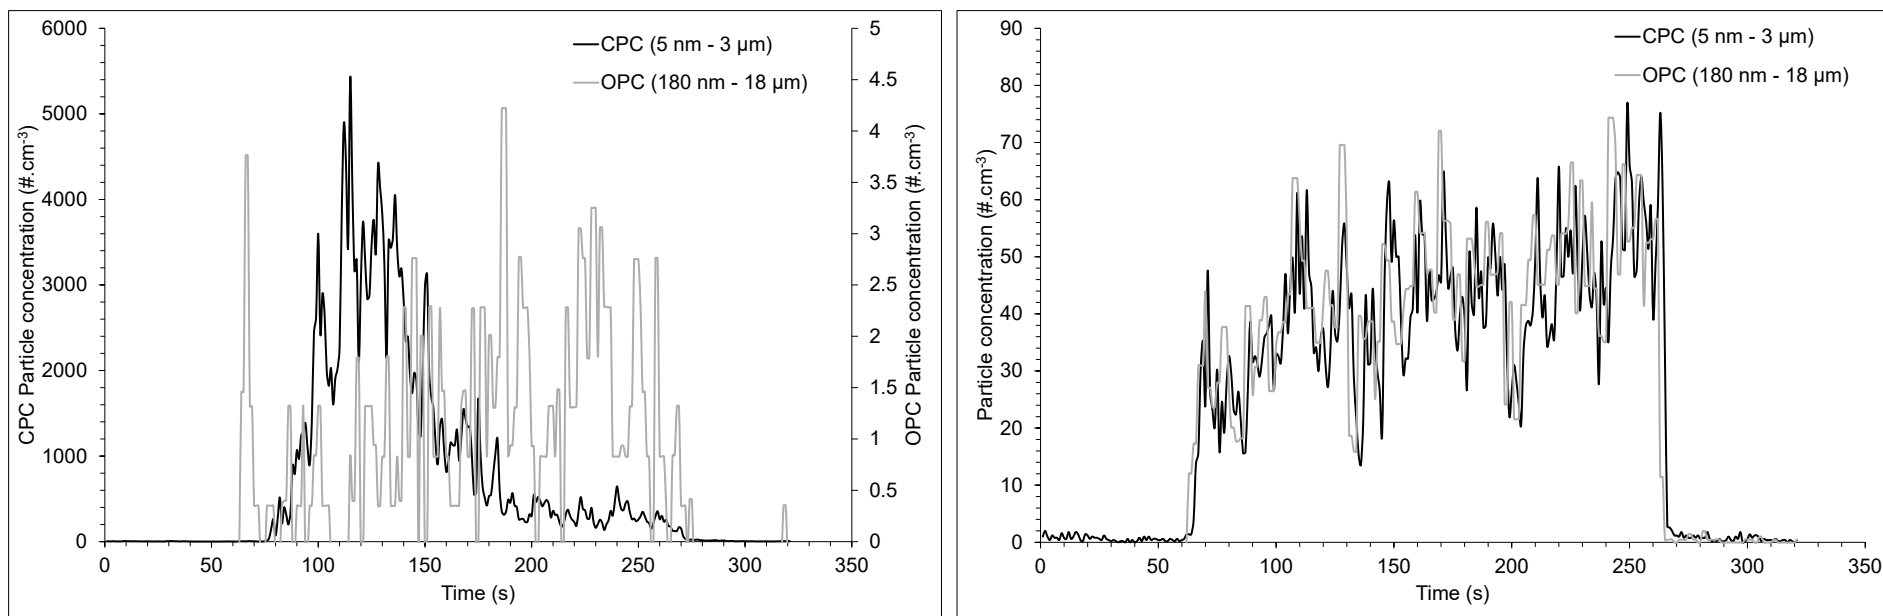

Fig. S5: Concentration of particles released per  $\text{cm}^3$  measured by CPC (black) and OPC (grey) during mechanical sollicitation respectively for the first triplicate of W before artificial weathering (left) and  $\text{Wn}_{\text{TiO}_2}$  after 500 hours exposure to artificial weathering.

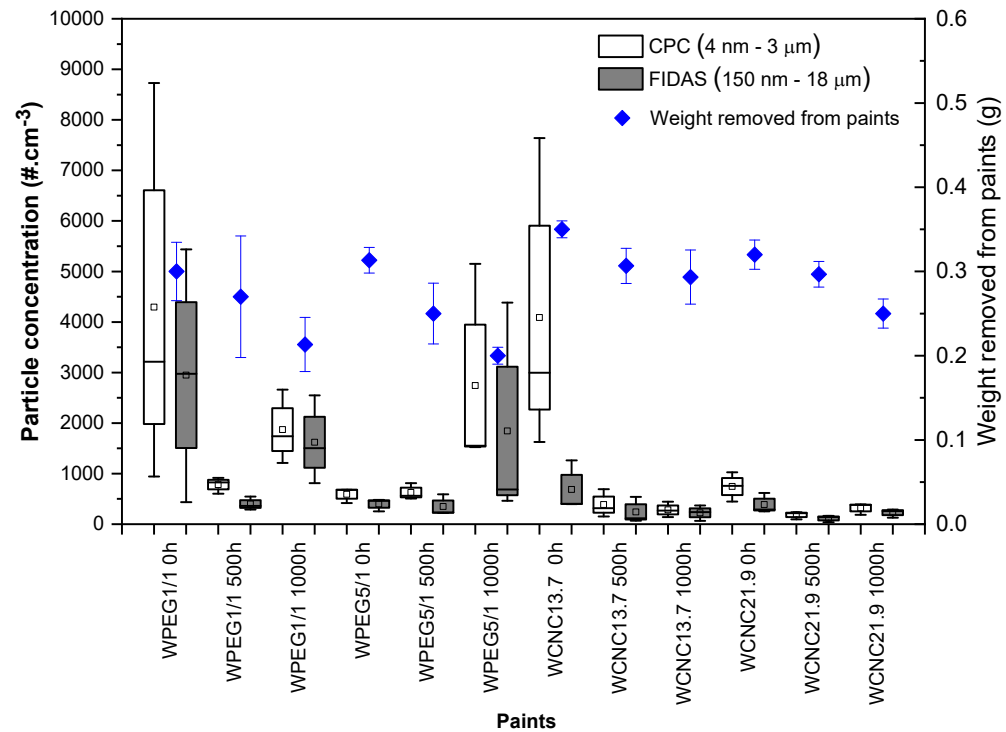

Fig. S6: Concentration of particles released per cm<sup>3</sup> measured by CPC in white in the range 4 nm to 3 μm and OPC in grey from 150 nm to 18 μm and weight removed from  $W_{\text{PEG1/1}}$ ,  $W_{\text{PEG5/1}}$ ,  $W_{\text{CNC13.7}}$  and  $W_{\text{CNC21.9}}$  paints before and after 500 hours and 1000 hours exposure to artificial weathering.



Table S3: Evolution of the mass of Taber samples and loss of mass due to weathering compared to the sample before UV stress. Each value is an average value from triplicate

| Paints               | Artificial weathering (hours) | Sample weight before abrasion (g) | Sample weight after abrasion (g) | Amount of paint abraded (g) | $\Delta$ of weight 0h-Xh (g) |
|----------------------|-------------------------------|-----------------------------------|----------------------------------|-----------------------------|------------------------------|
| T                    | 0                             | 27.86                             | 27.49                            | 0.37                        | -                            |
|                      | 500                           | 27.61                             | 27.33                            | 0.28                        | 0.09                         |
|                      | 1000                          | 27.43                             | 27.15                            | 0.28                        | 0.09                         |
| T <sub>nTiO2</sub>   | 0                             | 27.83                             | 27.48                            | 0.35                        | -                            |
|                      | 500                           | 27.31                             | 27.09                            | 0.22                        | 0.135                        |
|                      | 1000                          | 27.32                             | 27.12                            | 0.20                        | 0.150                        |
| W                    | 0                             | 27.66                             | 27.35                            | 0.31                        | -                            |
|                      | 500                           | 27.49                             | 27.21                            | 0.28                        | 0.030                        |
|                      | 1000                          | 27.70                             | 27.35                            | 0.35                        | -0.040                       |
| W <sub>nTiO2</sub>   | 0                             | 27.60                             | 27.31                            | 0.28                        | -                            |
|                      | 500                           | 27.29                             | 27.07                            | 0.22                        | 0.06                         |
|                      | 1000                          | 27.23                             | 27.05                            | 0.18                        | 0.10                         |
| W <sub>PEG1/1</sub>  | 0                             | 27.52                             | 27.22                            | 0.30                        | -                            |
|                      | 500                           | 27.59                             | 27.32                            | 0.27                        | 0.03                         |
|                      | 1000                          | 27.38                             | 27.17                            | 0.21                        | 0.09                         |
| W <sub>PEG5/1</sub>  | 0                             | 27.60                             | 27.29                            | 0.31                        | -                            |
|                      | 500                           | 27.51                             | 27.26                            | 0.25                        | 0.06                         |
|                      | 1000                          | 27.34                             | 27.14                            | 0.20                        | 0.11                         |
| W <sub>CNC13.7</sub> | 0                             | 27.83                             | 27.48                            | 0.35                        | -                            |
|                      | 500                           | 27.65                             | 27.35                            | 0.31                        | 0.04                         |
|                      | 1000                          | 27.69                             | 27.40                            | 0.29                        | 0.06                         |
| W <sub>CNC21.9</sub> | 0                             | 27.72                             | 27.40                            | 0.32                        | -                            |
|                      | 500                           | 27.56                             | 27.27                            | 0.30                        | 0.02                         |
|                      | 1000                          | 27.51                             | 27.26                            | 0.25                        | 0.07                         |

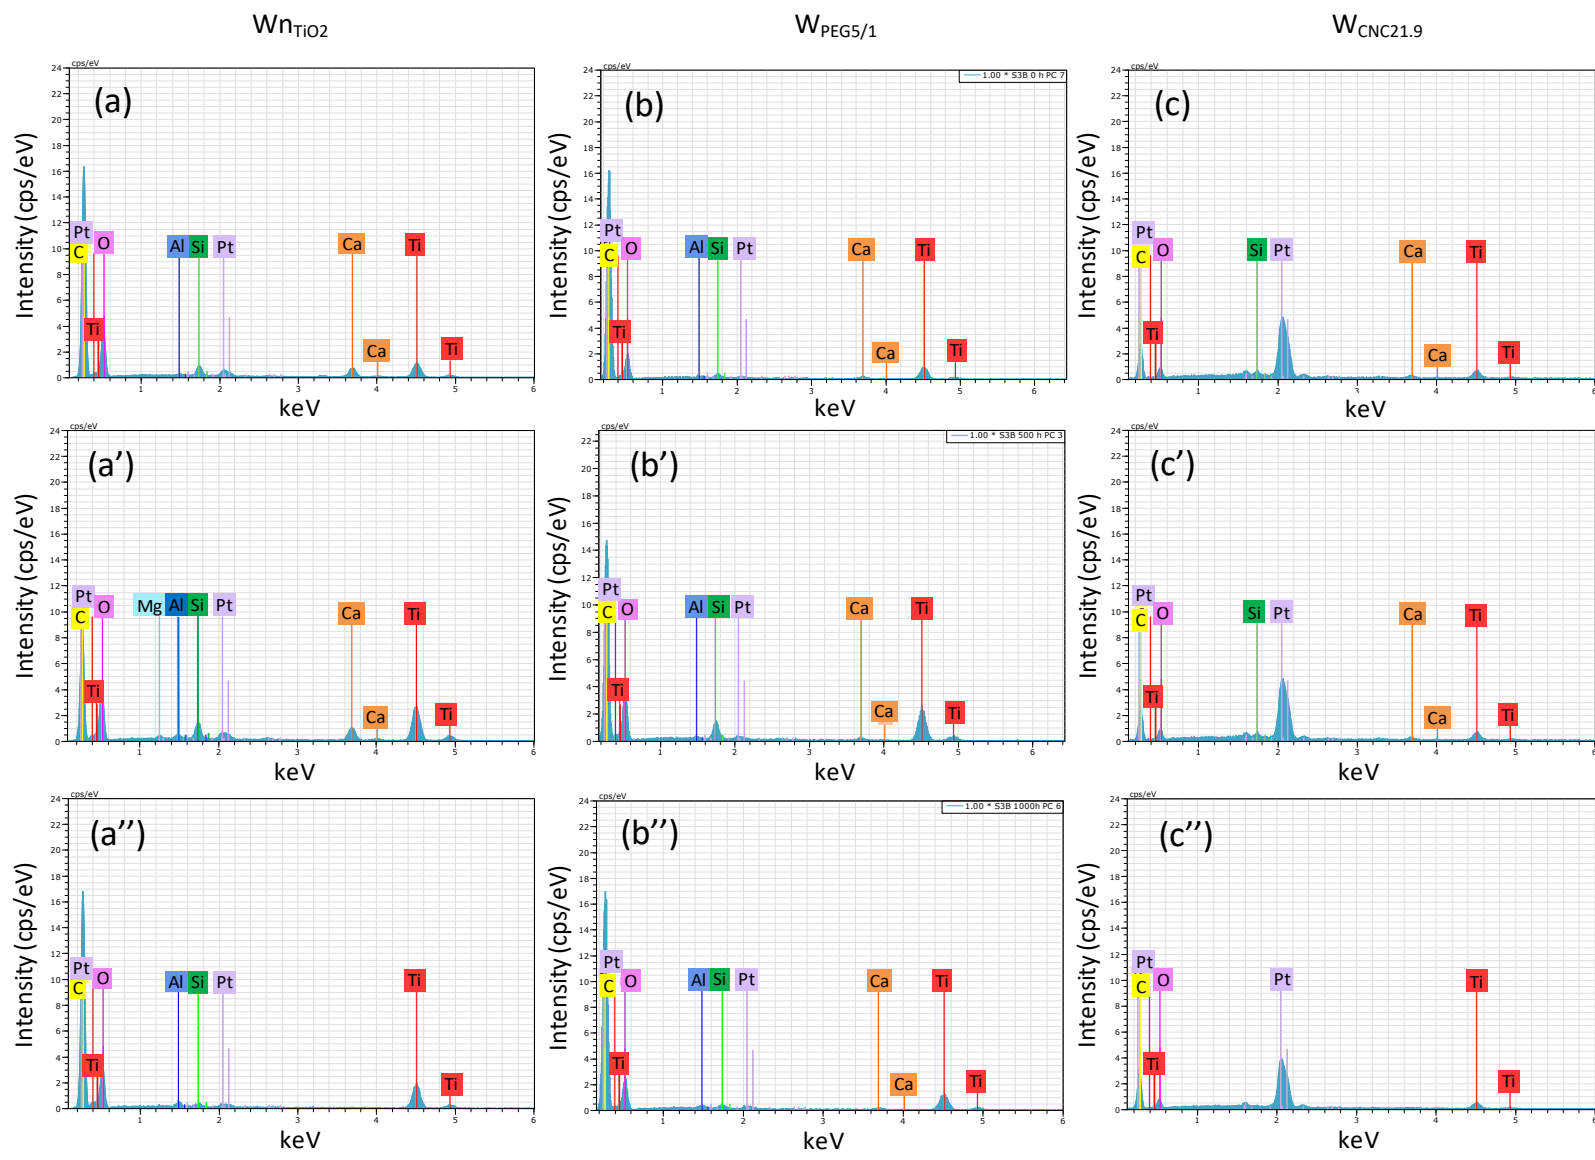

Fig. S7: EDX spectra of particles released from paints  $W_{TiO_2}$  (a),  $W_{PEG5/1}$  (b) and  $W_{CNC21.9}$  (c) paints. The paints after 500 hours and 1000 hours exposure to artificial weathering are noted respectively with (') and (").

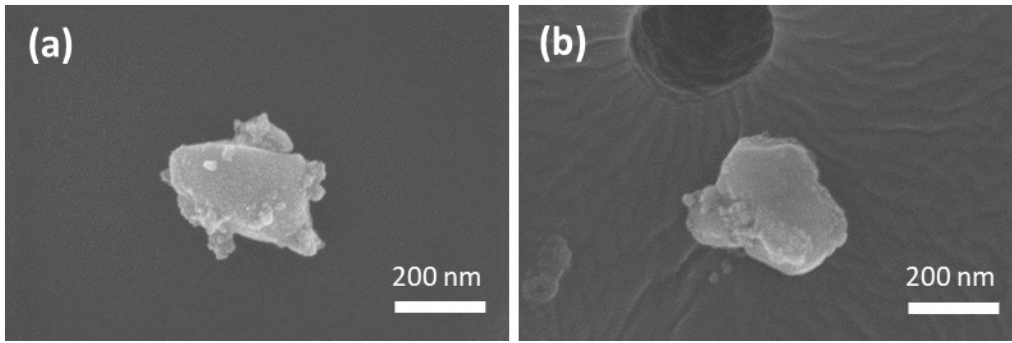

Fig. S8: SEM images of individual particles released from  $WnTiO_2$  after 500 hours (a) and 1000 hours (b) exposure to artificial weathering, magnification 100 K.

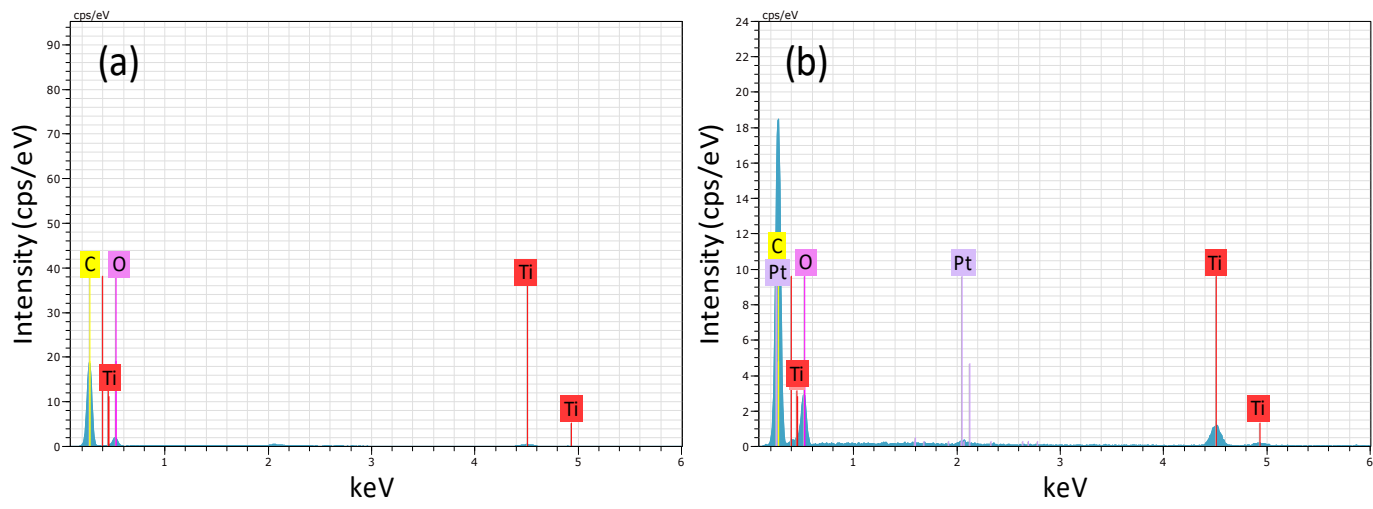

Fig. S9: EDX spectra of individual particles released from  $WnTiO_2$  after 500 hours (a) and 1000 hours (b) exposure to artificial weathering.
